# Supplementary material
Source: Springer Nature journal article supplement (https://www.springermedizin.de/resource/supplementary/12960_2013_387_MOESM2_ESM.pdf/9569984)
Supplement: MOESM2 [file 9569984]

## Initial Stakeholder Consultation

### Key Constituencies

Ministry of Health

Ministry of Education

Ministry of Science and Technology

Mozambican Medical Council

Administrative Leadership

Universidade Eduardo Mondlane

Universidade Lúrio

Universidade Zambeze

### Key faculty

University of California, San Diego

Federal University of Bahia

IHMT-Universidade Nova de Lisboa

### Methods

Focus group discussions

Unstructured Interviews

Monthly research priority setting sessions

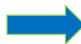

### Needs Assessment Goals

Identify barriers to research

Identify research priorities

Identify core research faculty

Research conduct

Research training

Research Administration

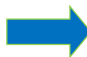

### Needs Assessment Participants

UEM Faculty

MCH Specialists

MCH Medical Residents

MCH/UEM supervisory leadership
